# Supplementary material
Source: Springer Nature journal article supplement (https://www.springermedizin.de/resource/supplementary/12883_2010_393_MOESM1_ESM.pdf/9455050)

**pH 5**

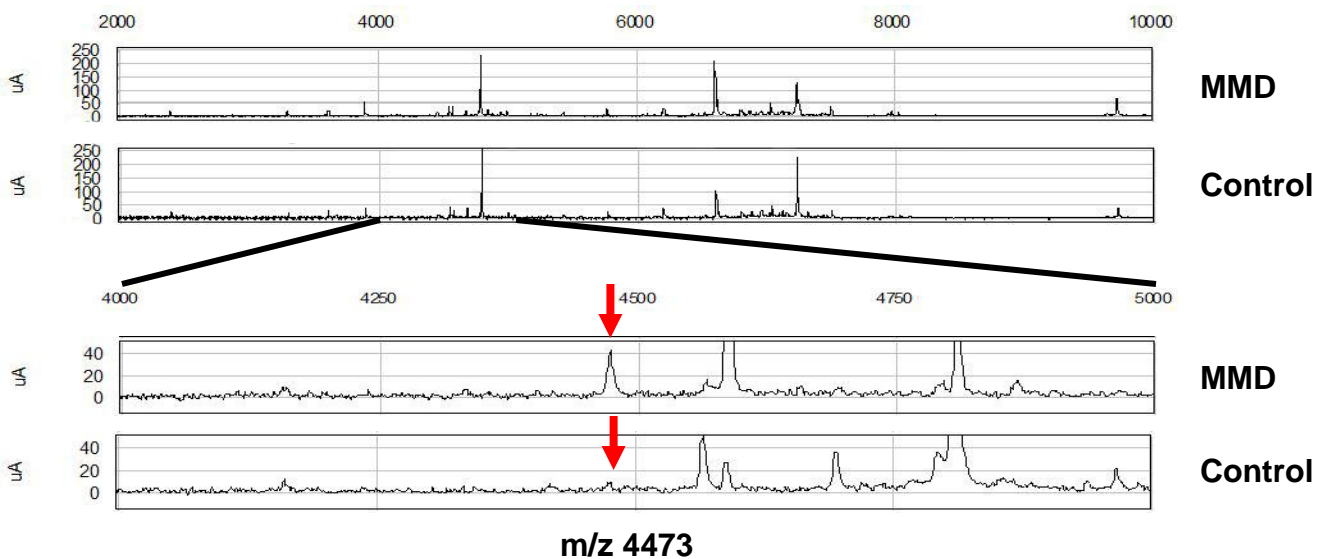

**pH 7**

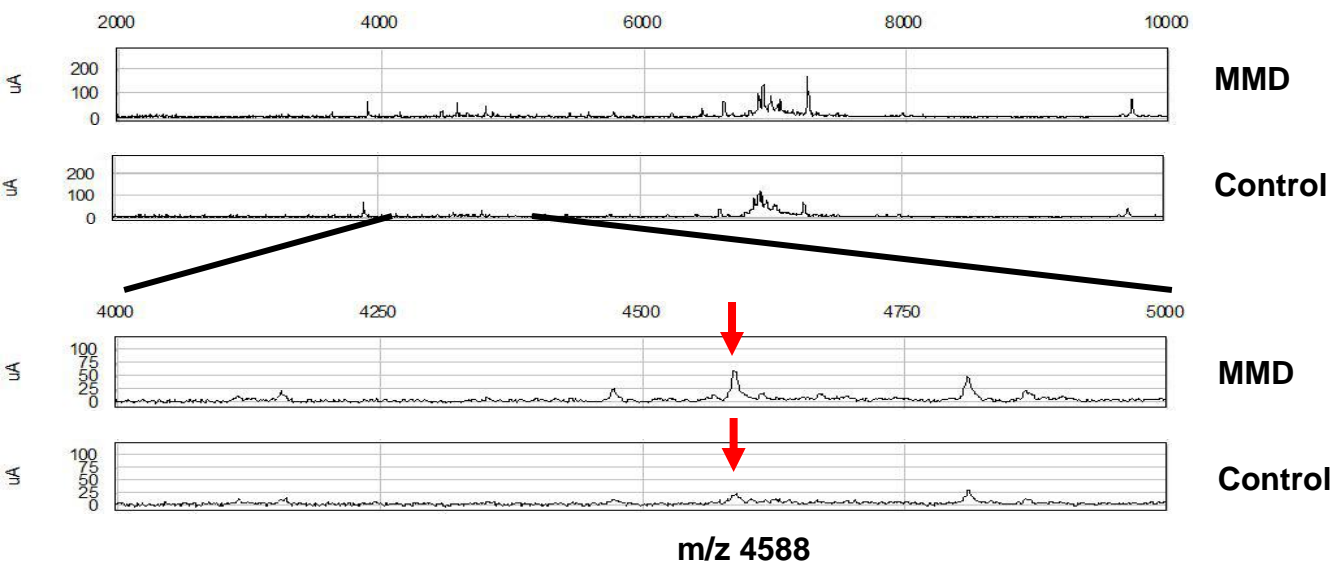

**pH 9**

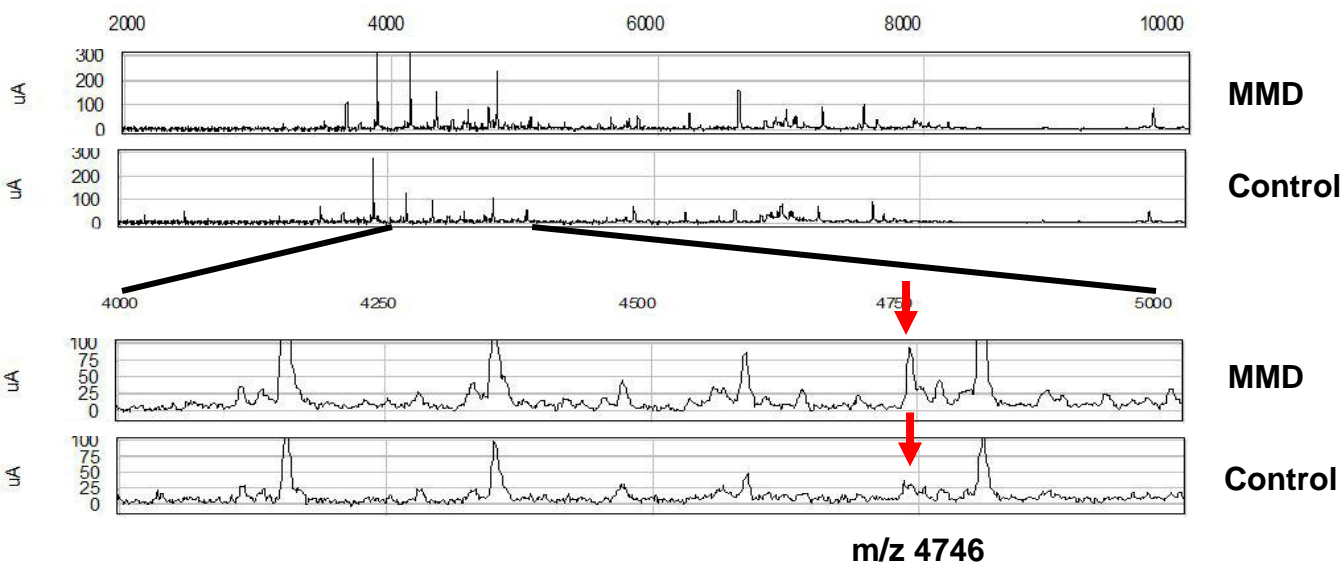

Supplement: MOESM1 [file 9455050]
